# Supplementary material for: Combinatorial Effects of the Natural Products Arctigenin, Chlorogenic Acid, and Cinnamaldehyde Commit Oxidation Assassination on Breast Cancer Cells
Source: MDPI journal article supplement (doi:10.3390/antiox11030591), 2022-03-20
Supplement: s1 [file s1]

## SUPPLEMENTARY MATERIAL

### Combinatorial Effects of the Natural Products Arctigenin, Chlorogenic Acid, and Cinnamaldehyde Commit Oxidation Assassination on Breast Cancer Cells

Caroline Schuster <sup>1</sup>, Nicholas Wolpert <sup>1</sup>, Naima Moustaid-Moussa <sup>2,3</sup> and Lauren S. Gollahon <sup>1,3,\*</sup>

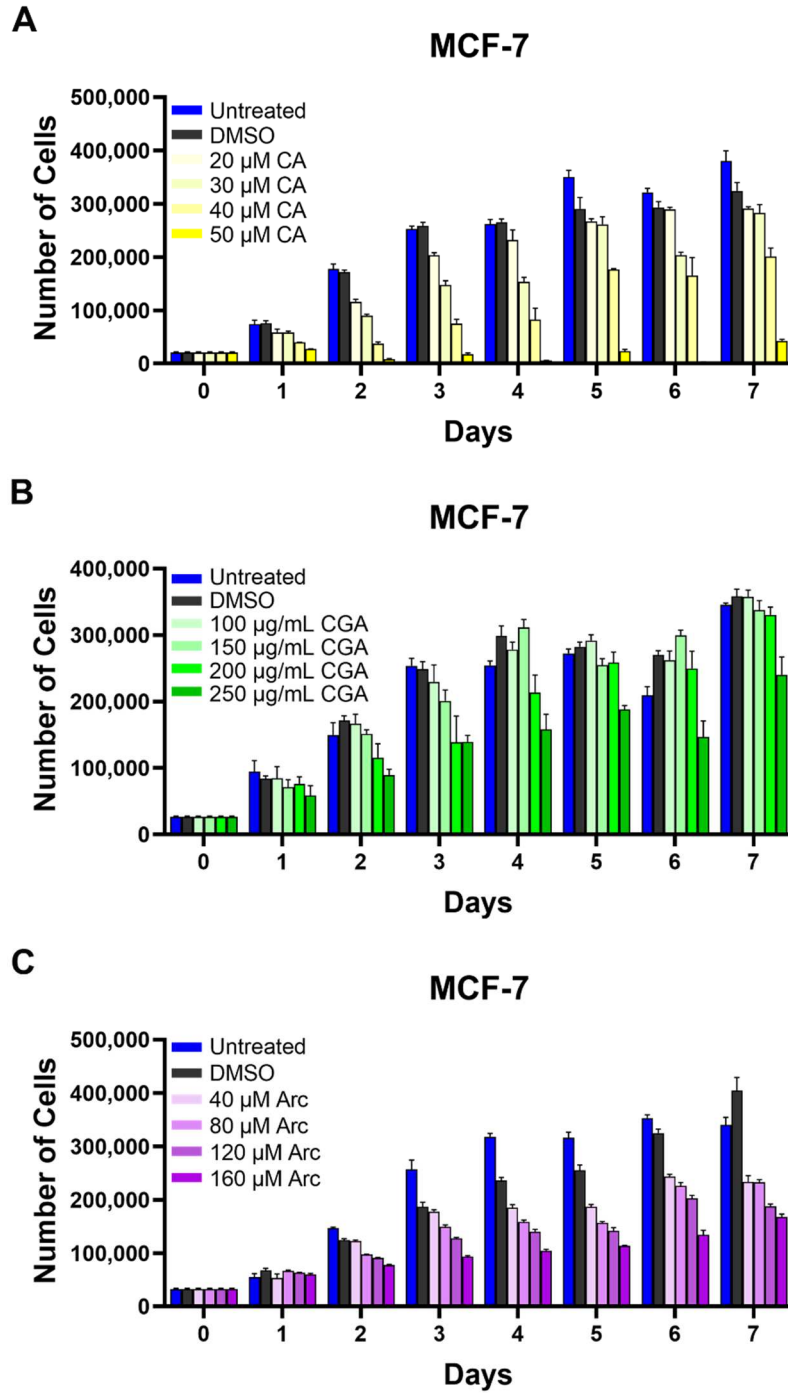

**Figure S1.** Different test concentrations of MCF-7 breast cancer cells treated with (A) 20  $\mu$ M, 30  $\mu$ M, 40  $\mu$ M, and 50  $\mu$ M CA, (B) 100  $\mu$ g/mL, 150  $\mu$ g/mL, 200  $\mu$ g/mL, and 250  $\mu$ g/mL CGA, and (C) 40  $\mu$ M, 80  $\mu$ M, 120  $\mu$ M, and 160  $\mu$ M Arc. Bars represent the mean  $\pm$  SEM of three biological replicates ( $n=3$ ).

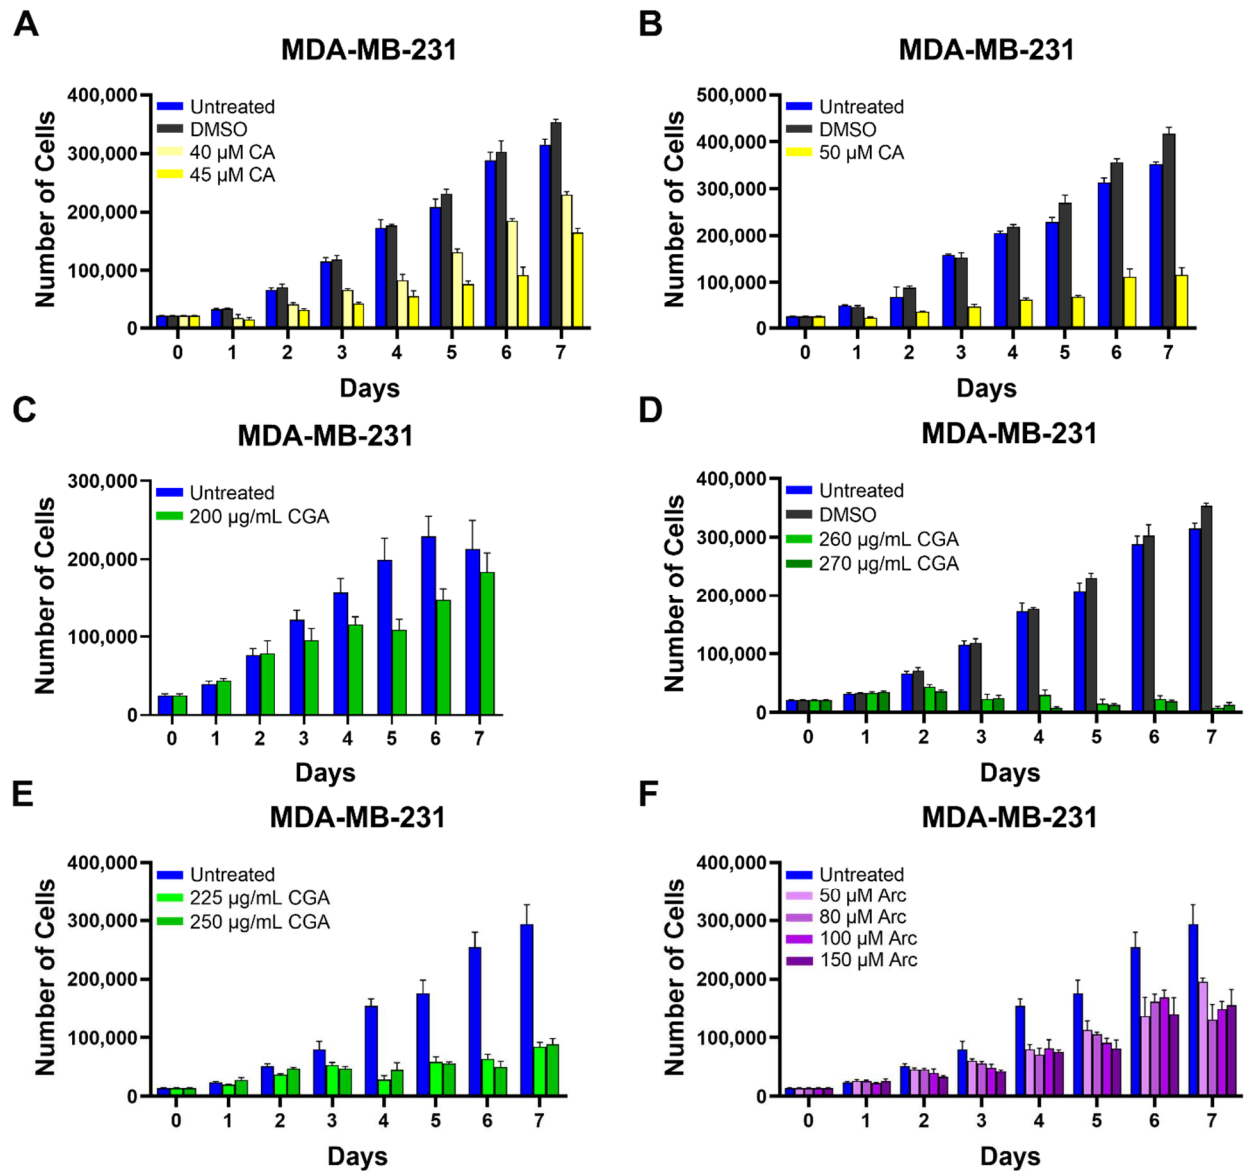

**Figure S2.** Different test concentrations of MDA-MB-231 breast cancer cells treated with (A) 40  $\mu$ M, and 45  $\mu$ M CA, (B) 50  $\mu$ M CA, (C) 200  $\mu$ g/mL CGA, (D) 260  $\mu$ g/mL and 270  $\mu$ g/mL CGA, (E) 225  $\mu$ g/mL and 250  $\mu$ g/mL CGA, and (F) 50  $\mu$ M, 80  $\mu$ M, 100  $\mu$ M, and 150  $\mu$ M Arc. Bars represent the mean  $\pm$  SEM of three biological replicates ( $n=3$ ).

**A**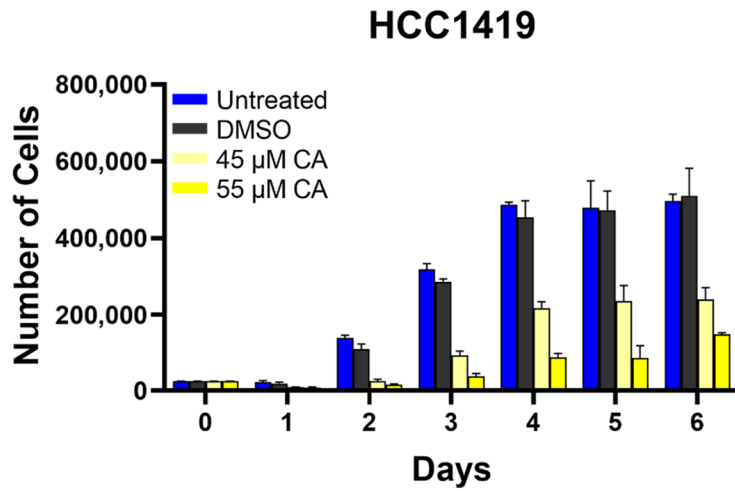**B**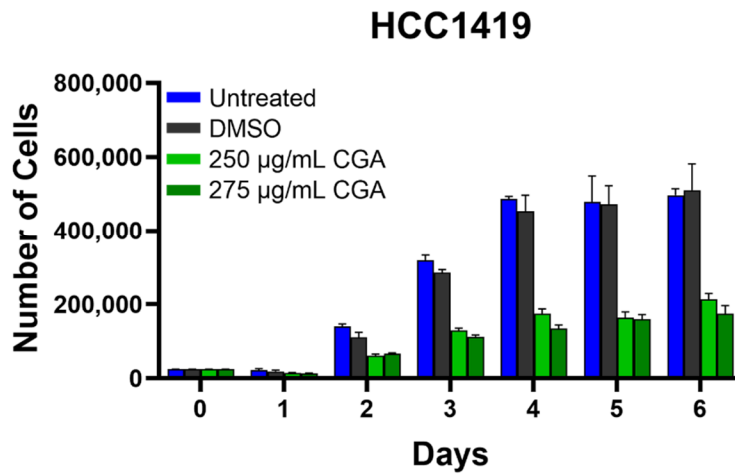**C**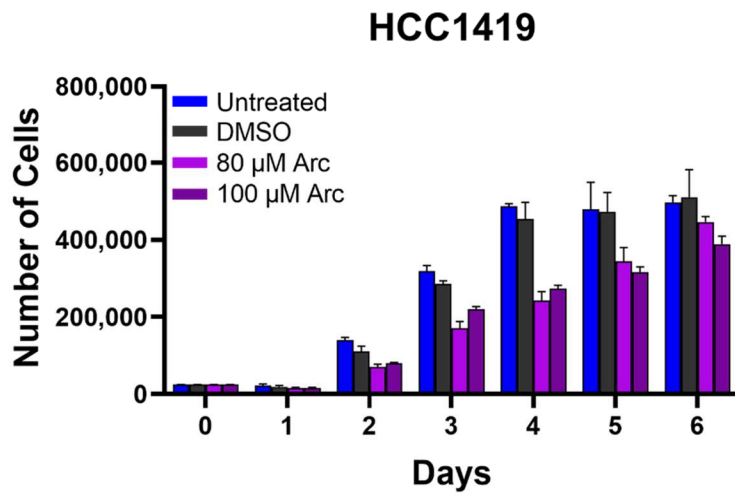

**Figure S3.** Different test concentrations of HCC1419 breast cancer cells treated with (A) 45  $\mu$ M and 55  $\mu$ M CA, (B) 250  $\mu$ g/mL and 275  $\mu$ g/mL CGA, and (C) 80  $\mu$ M and 100  $\mu$ M Arc. Bars represent the mean  $\pm$  SEM of three biological replicates ( $n=3$ ).

**Table S1.** Statistical analysis of MCF-7 cell growth under combination treatments. Shown are the p-values from post-hoc Tukey HSD test following a One-way ANOVA. Differences between treatment groups were considered statistically significant with  $p \leq 0.05$ .

| <b>Treatment Comparison</b> | <b>Day 1</b> | <b>Day 2</b> | <b>Day 3</b> | <b>Day 4</b> | <b>Day 5</b> | <b>Day 6</b> | <b>Day 7</b> |
|-----------------------------|--------------|--------------|--------------|--------------|--------------|--------------|--------------|
| Untreated - DMSO            | 0.8370       | 0.7680       | 0.0540       | 0.0000       | 0.0000       | 0.1130       | 0.0930       |
| Untreated - CA+CGA          | 0.0000       | 0.0000       | 0.0000       | 0.0000       | 0.0000       | 0.0000       | 0.0000       |
| Untreated - CA+Arc          | 0.0000       | 0.0000       | 0.0000       | 0.0000       | 0.0000       | 0.0000       | 0.0000       |
| Untreated - CGA+Arc         | 0.4370       | 0.0000       | 0.0000       | 0.0000       | 0.0000       | 0.0000       | 0.0000       |
| Untreated - CA+CGA+Arc      | 0.0000       | 0.0000       | 0.0000       | 0.0000       | 0.0000       | 0.0000       | 0.0000       |
| DMSO - CA+CGA               | 0.0000       | 0.0000       | 0.0000       | 0.0000       | 0.0000       | 0.0000       | 0.0000       |
| DMSO - CA+Arc               | 0.0000       | 0.0000       | 0.0000       | 0.0000       | 0.0000       | 0.0000       | 0.0000       |
| DMSO - CGA+Arc              | 0.0770       | 0.0000       | 0.0000       | 0.0000       | 0.0000       | 0.0000       | 0.0000       |
| DMSO - CA+CGA+Arc           | 0.0000       | 0.0000       | 0.0000       | 0.0000       | 0.0000       | 0.0000       | 0.0000       |
| CA+CGA - CA+Arc             | 0.9220       | 0.3980       | 0.7830       | 0.1490       | 0.7010       | 0.9830       | 0.6090       |
| CA+CGA - CGA+Arc            | 0.0000       | 0.0820       | 0.0070       | 0.0000       | 0.0000       | 0.0040       | 0.0000       |
| CA+CGA - CA+CGA+Arc         | 0.6740       | 1.0000       | 0.9970       | 0.9990       | 0.9710       | 1.0000       | 0.9990       |
| CA+Arc - CGA+Arc            | 0.0010       | 0.8870       | 0.0600       | 0.0000       | 0.0000       | 0.0110       | 0.0010       |
| CA+Arc - CA+CGA+Arc         | 0.2130       | 0.3630       | 0.9530       | 0.2400       | 0.9790       | 0.9700       | 0.4290       |
| CGA+Arc - CA+CGA+Arc        | 0.0000       | 0.0730       | 0.0140       | 0.0000       | 0.0000       | 0.0030       | 0.0000       |

**Table S2.** Statistical analysis of MDA-MB-231 cell growth under combination treatments. Shown are p-values from post-hoc Tukey HSD test following a One-way ANOVA. Differences between treatment groups were considered statistically significant with  $p \leq 0.05$ .

| Treatment Comparison   | Day 1  | Day 2  | Day 3  | Day 4  | Day 5  | Day 6  | Day 7  |
|------------------------|--------|--------|--------|--------|--------|--------|--------|
| Untreated - DMSO       | 0.8618 | 0.2222 | 0.9984 | 0.6056 | 0.9536 | 0.6995 | 0.0497 |
| Untreated - CA+CGA     | 0.1387 | 0.0006 | 0.0000 | 0.0000 | 0.0018 | 0.0000 | 0.0000 |
| Untreated - CA+Arc     | 0.0090 | 0.0001 | 0.0000 | 0.0000 | 0.0119 | 0.0002 | 0.0000 |
| Untreated - CGA+Arc    | 1.0000 | 0.0058 | 0.0002 | 0.0000 | 0.0099 | 0.0001 | 0.0000 |
| Untreated - CA+CGA+Arc | 0.0148 | 0.0000 | 0.0000 | 0.0000 | 0.0014 | 0.0000 | 0.0000 |
| DMSO - CA+CGA          | 0.0215 | 0.0328 | 0.0000 | 0.0000 | 0.0005 | 0.0002 | 0.0000 |
| DMSO - CA+Arc          | 0.0015 | 0.0058 | 0.0000 | 0.0000 | 0.0030 | 0.0013 | 0.0000 |
| DMSO - CGA+Arc         | 0.8219 | 0.2990 | 0.0001 | 0.0000 | 0.0025 | 0.0009 | 0.0000 |
| DMSO - CA+CGA+Arc      | 0.0023 | 0.0014 | 0.0000 | 0.0000 | 0.0004 | 0.0001 | 0.0000 |
| CA+CGA - CA+Arc        | 0.5883 | 0.8977 | 1.0000 | 0.5536 | 0.8413 | 0.7773 | 0.0085 |
| CA+CGA - CGA+Arc       | 0.1594 | 0.7294 | 0.6097 | 0.0471 | 0.8868 | 0.8814 | 0.0638 |
| CA+CGA - CA+CGA+Arc    | 0.7543 | 0.4315 | 0.5178 | 0.9472 | 1.0000 | 0.9999 | 0.9999 |
| CA+Arc - CGA+Arc       | 0.0104 | 0.2206 | 0.5487 | 0.5619 | 1.0000 | 0.9999 | 0.8287 |
| CA+Arc - CA+CGA+Arc    | 0.9996 | 0.9405 | 0.5782 | 0.1778 | 0.7787 | 0.6705 | 0.0059 |
| CGA+Arc - CA+CGA+Arc   | 0.0172 | 0.0530 | 0.0487 | 0.0109 | 0.8323 | 0.7939 | 0.0443 |

**Table S3.** Statistical analysis of HCC1419 cell growth under combination treatments. Shown are p-values from post-hoc Tukey HSD test following a One-way ANOVA. Differences between treatment groups were considered statistically significant with  $p \leq 0.05$ .

| <b>Treatment Comparison</b> | <b>Day 1</b> | <b>Day 2</b> | <b>Day 3</b> | <b>Day 4</b> | <b>Day 5</b> | <b>Day 6</b> |
|-----------------------------|--------------|--------------|--------------|--------------|--------------|--------------|
| Untreated - DMSO            | 0.9932       | 0.0126       | 0.0150       | 0.1776       | 0.8162       | 0.6970       |
| Untreated - CA+CGA          | 0.0313       | 0.0000       | 0.0000       | 0.0000       | 0.0000       | 0.0000       |
| Untreated - CA+Arc          | 0.0492       | 0.0000       | 0.0000       | 0.0000       | 0.0000       | 0.0000       |
| Untreated - CGA+Arc         | 0.6037       | 0.0000       | 0.0000       | 0.0000       | 0.0000       | 0.0000       |
| Untreated - CA+CGA+Arc      | 0.0198       | 0.0000       | 0.0000       | 0.0000       | 0.0000       | 0.0000       |
| DMSO - CA+CGA               | 0.0126       | 0.0000       | 0.0000       | 0.0000       | 0.0000       | 0.0000       |
| DMSO - CA+Arc               | 0.0198       | 0.0000       | 0.0000       | 0.0000       | 0.0000       | 0.0000       |
| DMSO - CGA+Arc              | 0.3235       | 0.0000       | 0.0000       | 0.0000       | 0.0000       | 0.0000       |
| DMSO - CA+CGA+Arc           | 0.0080       | 0.0000       | 0.0000       | 0.0000       | 0.0000       | 0.0000       |
| CA+CGA - CA+Arc             | 0.9998       | 0.5202       | 0.9962       | 0.9762       | 0.0103       | 0.1130       |
| CA+CGA - CGA+Arc            | 0.3852       | 0.9574       | 0.3707       | 0.7556       | 0.5449       | 0.9992       |
| CA+CGA - CA+CGA+Arc         | 0.9998       | 0.1207       | 0.1320       | 0.1258       | 0.3196       | 0.0035       |
| CA+Arc - CGA+Arc            | 0.5270       | 0.1741       | 0.1906       | 0.9863       | 0.1776       | 0.0647       |
| CA+Arc - CA+CGA+Arc         | 0.9932       | 0.8886       | 0.2694       | 0.0387       | 0.0003       | 0.0001       |
| CGA+Arc - CA+CGA+Arc        | 0.2690       | 0.0309       | 0.0044       | 0.0133       | 0.0206       | 0.0061       |

**Table S4.** Statistical analysis of individual and combination treatment comparisons based on ratio of treatment/untreated in MCF-7 cells. Shown are p-values from post-hoc Tukey HSD test following a One-way ANOVA. Differences between treatment groups were considered statistically significant with  $p \leq 0.05$ .

| <b>Treatment Comparison</b> | <b>Day 1</b> | <b>Day 2</b> | <b>Day 3</b> | <b>Day 4</b> | <b>Day 5</b> | <b>Day 6</b> | <b>Day 7</b> |
|-----------------------------|--------------|--------------|--------------|--------------|--------------|--------------|--------------|
| CA - CGA                    | 0.9980       | 0.0950       | 0.0000       | 0.9150       | 0.0000       | 0.0430       | 0.9720       |
| CA - Arc                    | 0.8340       | 0.0210       | 0.0000       | 0.8270       | 0.0000       | 0.3900       | 1.0000       |
| CA - CA+CGA                 | 0.4580       | 0.0190       | 0.0000       | 0.0000       | 0.0000       | 0.0010       | 0.0000       |
| CA - CA+Arc                 | 0.7020       | 0.2350       | 0.0000       | 0.0000       | 0.0000       | 0.0020       | 0.0000       |
| CA - CGA+Arc                | 0.8890       | 0.6240       | 0.0010       | 0.0020       | 0.0000       | 0.0320       | 0.0000       |
| CA - CA+CGA+Arc             | 0.1810       | 0.0170       | 0.0000       | 0.0000       | 0.0000       | 0.0010       | 0.0000       |
| CGA - Arc                   | 0.5560       | 0.9770       | 0.3320       | 0.2520       | 0.0000       | 0.8050       | 0.9960       |
| CGA - CA+CGA                | 0.7460       | 0.0000       | 0.0000       | 0.0000       | 0.0000       | 0.0000       | 0.0000       |
| CGA - CA+Arc                | 0.9280       | 0.0010       | 0.0000       | 0.0000       | 0.0000       | 0.0000       | 0.0000       |
| CGA - CGA+Arc               | 0.6330       | 0.0040       | 0.0000       | 0.0000       | 0.0000       | 0.0000       | 0.0000       |
| CGA - CA+CGA+Arc            | 0.3770       | 0.0000       | 0.0000       | 0.0000       | 0.0000       | 0.0000       | 0.0000       |
| Arc - CA+CGA                | 0.0600       | 0.0000       | 0.0000       | 0.0000       | 0.0000       | 0.0000       | 0.0000       |
| Arc - CA+Arc                | 0.1250       | 0.0000       | 0.0000       | 0.0010       | 0.0000       | 0.0000       | 0.0000       |
| Arc - CGA+Arc               | 1.0000       | 0.0010       | 0.0000       | 0.0180       | 0.0000       | 0.0010       | 0.0000       |
| Arc - CA+CGA+Arc            | 0.0180       | 0.0000       | 0.0000       | 0.0000       | 0.0000       | 0.0000       | 0.0000       |
| CA+CGA - CA+Arc             | 0.9990       | 0.7570       | 0.2940       | 0.9940       | 0.9550       | 1.0000       | 0.9960       |
| CA+CGA - CGA+Arc            | 0.0760       | 0.3290       | 0.0000       | 0.3430       | 0.0000       | 0.6020       | 0.1520       |
| CA+CGA - CA+CGA+Arc         | 0.9930       | 1.0000       | 0.9790       | 1.0000       | 0.9980       | 1.0000       | 1.0000       |
| CA+Arc - CGA-Arc            | 0.1550       | 0.9830       | 0.0010       | 0.6940       | 0.0010       | 0.7360       | 0.3670       |
| CA+Arc - CA+CGA-Arc         | 0.9220       | 0.7280       | 0.7300       | 0.9970       | 0.9990       | 1.0000       | 0.9900       |
| CGA+Arc - CA+CGA+Arc        | 0.0230       | 0.3060       | 0.0000       | 0.3790       | 0.0000       | 0.5820       | 0.1250       |

**Table S5.** Statistical analysis of individual and combination treatment comparisons based on ratio of treatment/untreated in MDA-MB-231 cells. Shown are p-values from post-hoc Tukey HSD test following a One-way ANOVA. Differences between treatment groups were considered statistically significant with  $p \leq 0.05$ .

| <b>Treatment Comparison</b> | <b>Day 1</b> | <b>Day 2</b> | <b>Day 3</b> | <b>Day 4</b> | <b>Day 5</b> | <b>Day 6</b> | <b>Day 7</b> |
|-----------------------------|--------------|--------------|--------------|--------------|--------------|--------------|--------------|
| CA - CGA                    | 0.0016       | 0.8721       | 0.0137       | 0.8721       | 0.0355       | 0.0014       | 0.0010       |
| CA - Arc                    | 0.0001       | 0.5534       | 0.0667       | 0.5534       | 0.9991       | 0.2014       | 0.9072       |
| CA - CA+CGA                 | 0.0309       | 0.4250       | 0.6072       | 0.4250       | 0.0000       | 0.0000       | 0.0000       |
| CA - CA+Arc                 | 0.9254       | 0.0750       | 0.5258       | 0.0750       | 0.0401       | 0.0003       | 0.0008       |
| CA - CA+CGA                 | 0.0000       | 0.9978       | 0.9997       | 0.9978       | 0.0203       | 0.0002       | 0.0001       |
| CA - CA+CGA+Arc             | 0.7169       | 0.0129       | 0.0157       | 0.0129       | 0.0000       | 0.0000       | 0.0000       |
| CGA - Arc                   | 0.7059       | 0.9958       | 0.9705       | 0.9958       | 0.0156       | 0.0000       | 0.0077       |
| CGA - CA+CGA                | 0.6688       | 0.0630       | 0.0006       | 0.0630       | 0.0191       | 0.0319       | 0.0042       |
| CGA - CA+Arc                | 0.0113       | 0.0082       | 0.0005       | 0.0082       | 1.0000       | 0.9791       | 1.0000       |
| CGA - CGA+Arc               | 0.2081       | 0.5909       | 0.0273       | 0.5909       | 0.9999       | 0.8348       | 0.7913       |
| CGA - CA+CGA+Arc            | 0.0265       | 0.0014       | 0.0000       | 0.0014       | 0.0085       | 0.0147       | 0.0028       |
| Arc - CA+CGA                | 0.0742       | 0.0215       | 0.0029       | 0.0215       | 0.0000       | 0.0000       | 0.0000       |
| Arc - CA+Arc                | 0.0007       | 0.0028       | 0.0023       | 0.0028       | 0.0177       | 0.0000       | 0.0059       |
| Arc - CGA+Arc               | 0.9447       | 0.2835       | 0.1270       | 0.2835       | 0.0089       | 0.0000       | 0.0006       |
| Arc - CA+CGA+Arc            | 0.0016       | 0.0005       | 0.0001       | 0.0005       | 0.0000       | 0.0000       | 0.0000       |
| CA+CGA - CA+Arc             | 0.1955       | 0.9089       | 1.0000       | 0.9089       | 0.0168       | 0.1328       | 0.0055       |
| CA+CGA - CGA+Arc            | 0.0122       | 0.7281       | 0.3977       | 0.7281       | 0.0334       | 0.2871       | 0.0538       |
| CA+CGA - CA+CGA+Arc         | 0.3826       | 0.4000       | 0.2990       | 0.4000       | 0.9992       | 0.9994       | 1.0000       |
| CA+Arc - CGA-Arc            | 0.0001       | 0.1826       | 0.3305       | 0.1826       | 0.9997       | 0.9985       | 0.8585       |
| CA+Arc - CA+CGA-Arc         | 0.9989       | 0.9511       | 0.3622       | 0.9511       | 0.0075       | 0.0640       | 0.0036       |
| CGA+Arc - CA+CGA+Arc        | 0.0003       | 0.0341       | 0.0079       | 0.0341       | 0.0149       | 0.1492       | 0.0357       |



**Table S6.** Statistical analysis of individual and combination treatment comparisons based on ratio of treatment/untreated in HCC1419 cells. Shown are p-values from post-hoc Tukey HSD test following a One-way ANOVA. Differences between treatment groups were considered statistically significant with  $p \leq 0.05$ .

| <b>Treatment Comparison</b> | <b>Day 1</b> | <b>Day 2</b> | <b>Day 3</b> | <b>Day 4</b> | <b>Day 5</b> | <b>Day 6</b> |
|-----------------------------|--------------|--------------|--------------|--------------|--------------|--------------|
| CA - CGA                    | 0.1350       | 0.0004       | 0.1673       | 0.0004       | 0.3029       | 0.9290       |
| CA - Arc                    | 0.0181       | 0.0000       | 0.0004       | 0.0000       | 0.0480       | 0.0000       |
| CA - CA+CGA                 | 1.0000       | 0.8119       | 0.0185       | 0.8119       | 0.0016       | 0.1345       |
| CA - CA+Arc                 | 0.9994       | 0.9387       | 0.0074       | 0.9387       | 0.5661       | 0.9995       |
| CA - CA+CGA                 | 0.0132       | 0.2382       | 0.5717       | 0.2382       | 0.0205       | 0.0696       |
| CA - CA+CGA+Arc             | 0.9886       | 0.2440       | 0.0001       | 0.2440       | 0.0001       | 0.0000       |
| CGA - Arc                   | 0.9052       | 0.6537       | 0.0526       | 0.6537       | 0.0008       | 0.0000       |
| CGA - CA+CGA                | 0.1050       | 0.0038       | 0.0002       | 0.0038       | 0.1022       | 0.5816       |
| CGA - CA+Arc                | 0.2615       | 0.0001       | 0.0001       | 0.0001       | 0.9983       | 0.7601       |
| CGA - CGA+Arc               | 0.8353       | 0.0291       | 0.0070       | 0.0291       | 0.6863       | 0.3708       |
| CGA - CA+CGA+Arc            | 0.0384       | 0.0000       | 0.0000       | 0.0000       | 0.0042       | 0.0001       |
| Arc - CA+CGA                | 0.0138       | 0.0002       | 0.0000       | 0.0002       | 0.0000       | 0.0000       |
| Arc - CA+Arc                | 0.0390       | 0.0000       | 0.0000       | 0.0000       | 0.0019       | 0.0000       |
| Arc - CGA+Arc               | 1.0000       | 0.0015       | 0.0000       | 0.0015       | 0.0001       | 0.0000       |
| Arc - CA+CGA+Arc            | 0.0049       | 0.0000       | 0.0000       | 0.0000       | 0.0000       | 0.0000       |
| CA+CGA - CA+Arc             | 0.9967       | 0.2711       | 0.9984       | 0.2711       | 0.0419       | 0.0679       |
| CA+CGA - CGA+Arc            | 0.0100       | 0.9130       | 0.3670       | 0.9130       | 0.7897       | 0.9996       |
| CA+CGA - CA+CGA+Arc         | 0.9967       | 0.0239       | 0.1165       | 0.0239       | 0.5850       | 0.0010       |
| CA+Arc - CGA-Arc            | 0.0285       | 0.0425       | 0.1757       | 0.0425       | 0.3996       | 0.0341       |
| CA+Arc - CA+CGA-Arc         | 0.9024       | 0.7758       | 0.2583       | 0.7758       | 0.0017       | 0.0000       |
| CGA+Arc - CA+CGA+Arc        | 0.0036       | 0.0032       | 0.0024       | 0.0032       | 0.0758       | 0.0019       |

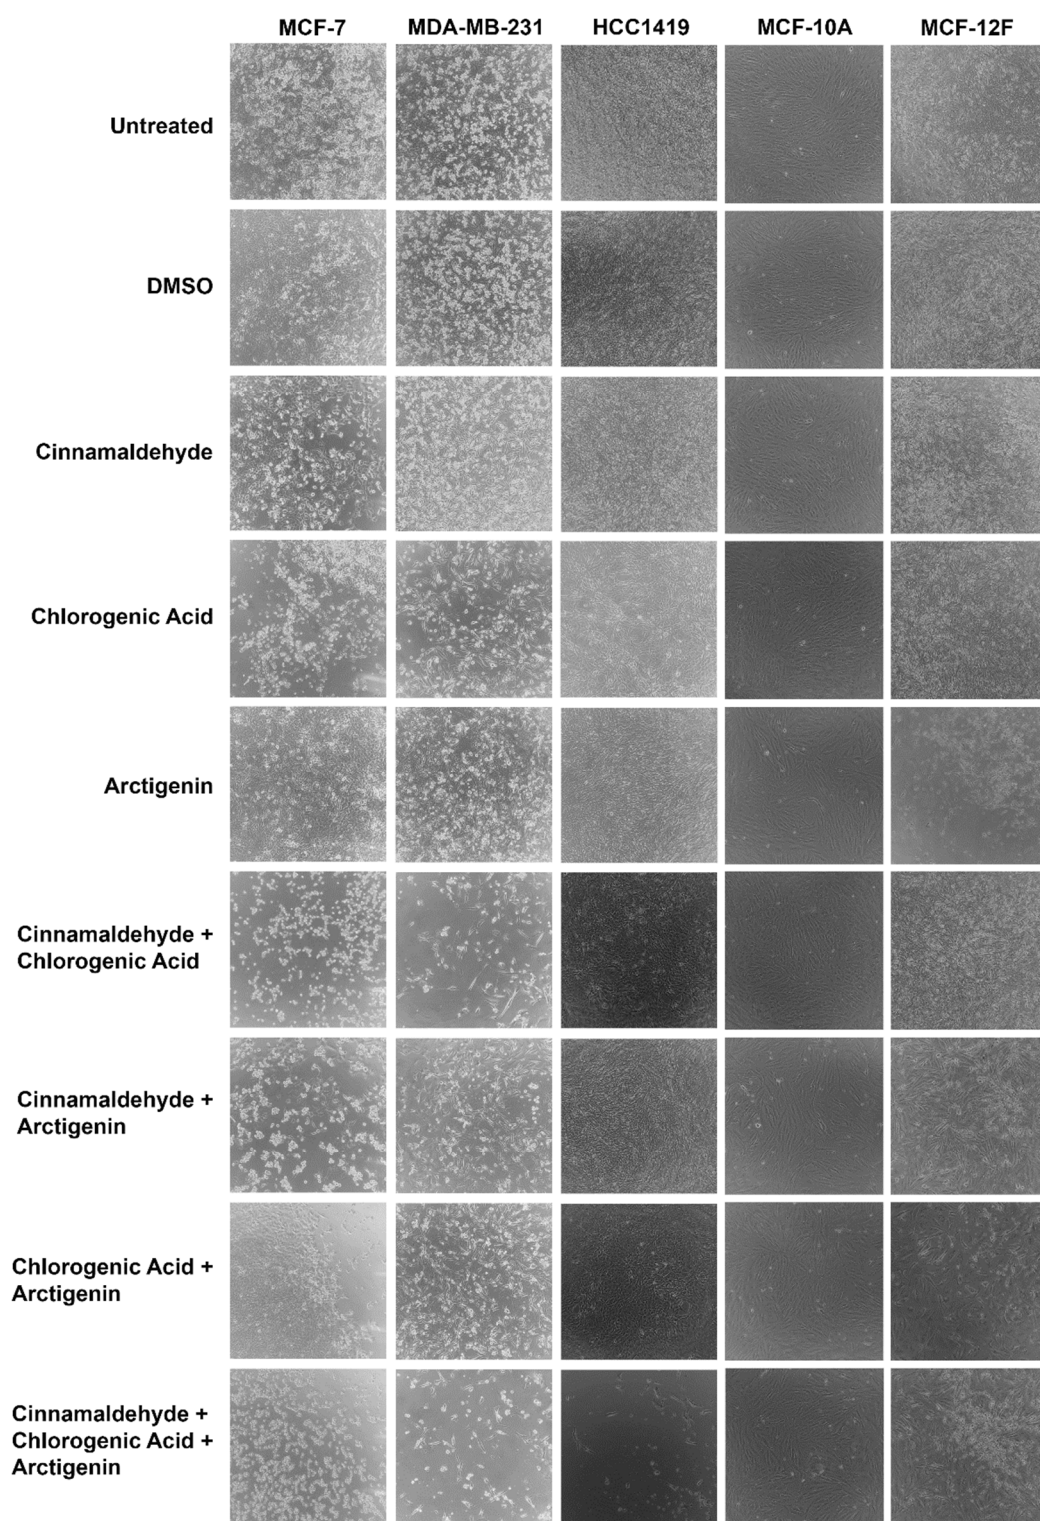

**Figure S4.** Photomicrographs of MCF-7, MDA-MB-231, and HCC1410 breast cancer and MCF-10A and MCF-12F normal mammary epithelial cells after 4 days of treatments with CA, CGA, and Arc, individually and in combination. Cells were visualized under 10X magnification.

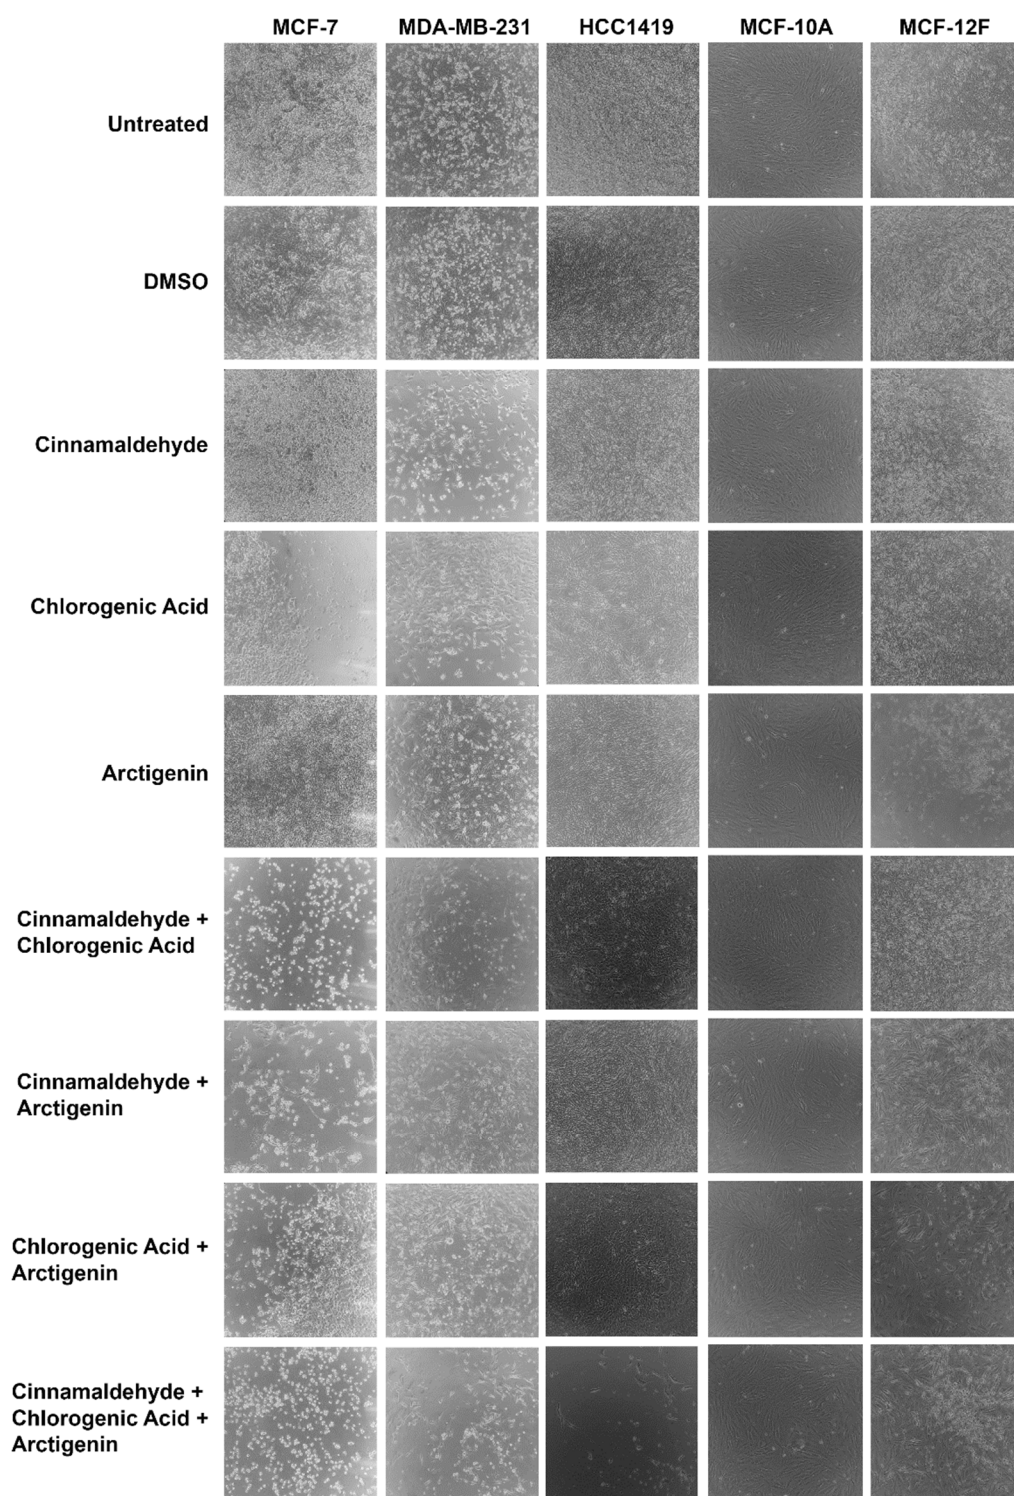

**Figure S5.** Photomicrographs of MCF-7, MDA-MB-231, and HCC1410 breast cancer and MCF-10A and MCF-12F normal mammary epithelial cells on the last day of treatment (Day 7 for MCF-7, MDA-MB-231, MCF-10A and MCF-12F cells; Day6 for HCC1419 cells) with CA, CGA, and Arc, individually and in combination. Cells were visualized under 10X magnification.

**Table S7.** Statistical analysis of cell numbers of CA, CGA, Arc treatments, alone and in combination, in MCF-10A cells. Shown are p-values from post-hoc Tukey HSD test following a One-way ANOVA. Differences between treatment groups were considered statistically significant with  $p \leq 0.05$ .

| Treatment Comparison   | Day 1  | Day 2  | Day 3  | Day 4  | Day 5  | Day 6  | Day 7  |
|------------------------|--------|--------|--------|--------|--------|--------|--------|
| Untreated - DMSO       | 0.9297 | 0.7846 | 0.0566 | 0.7527 | 0.9985 | 0.9941 | 0.4829 |
| Untreated - CA         | 0.9998 | 0.9352 | 1.0000 | 0.9994 | 1.0000 | 0.9843 | 0.5492 |
| Untreated - CGA        | 0.9998 | 1.0000 | 0.0566 | 0.9134 | 0.9999 | 1.0000 | 1.0000 |
| Untreated - Arc        | 0.8878 | 0.7846 | 0.1191 | 0.0421 | 0.0383 | 0.0024 | 0.0268 |
| Untreated - CA+CGA     | 0.8344 | 1.0000 | 0.9998 | 1.0000 | 0.9999 | 0.5996 | 0.9959 |
| Untreated - CA+Arc     | 1.0000 | 0.4236 | 0.0935 | 0.0017 | 0.0383 | 0.0043 | 0.0420 |
| Untreated - CGA+Arc    | 0.9798 | 0.9998 | 0.0087 | 0.0014 | 0.1693 | 0.0077 | 0.0027 |
| Untreated - CA+CGA+Arc | 1.0000 | 0.0664 | 0.0038 | 0.0003 | 0.0921 | 0.0024 | 0.0214 |
| DMSO - CA              | 0.9968 | 0.1644 | 0.0258 | 0.9705 | 0.9996 | 1.0000 | 1.0000 |
| DMSO - CGA             | 0.7003 | 0.7162 | 1.0000 | 1.0000 | 0.9600 | 1.0000 | 0.6169 |
| DMSO - Arc             | 1.0000 | 1.0000 | 1.0000 | 0.6128 | 0.1390 | 0.0136 | 0.7483 |
| DMSO - CA+CGA          | 1.0000 | 0.6430 | 0.0197 | 0.9134 | 1.0000 | 0.9656 | 0.9032 |
| DMSO - CA+Arc          | 0.9600 | 0.9992 | 1.0000 | 0.0532 | 0.1390 | 0.0239 | 0.8596 |
| DMSO - CGA+Arc         | 1.0000 | 0.9634 | 0.9881 | 0.0421 | 0.4672 | 0.0416 | 0.1800 |
| DMSO - CA+CGA+Arc      | 0.9297 | 0.7162 | 0.9113 | 0.0098 | 0.2931 | 0.0136 | 0.6840 |
| CA - CGA               | 0.9798 | 0.9634 | 0.0258 | 0.9978 | 0.9996 | 0.9997 | 0.6840 |
| CA - Arc               | 0.9912 | 0.1644 | 0.0566 | 0.1304 | 0.0480 | 0.0180 | 0.6840 |
| CA - CA+CGA            | 0.9798 | 0.9816 | 1.0000 | 1.0000 | 1.0000 | 0.9843 | 0.9375 |
| CA - CA+Arc            | 1.0000 | 0.0522 | 0.0437 | 0.0060 | 0.0480 | 0.0316 | 0.8074 |
| CA - CA+CGA            | 0.9998 | 0.7162 | 0.0038 | 0.0047 | 0.2049 | 0.0545 | 0.1485 |
| CA - CA+CGA+Arc        | 0.9998 | 0.0054 | 0.0017 | 0.0011 | 0.1134 | 0.0180 | 0.6169 |
| CGA - Arc              | 0.6252 | 0.7162 | 1.0000 | 0.4040 | 0.0153 | 0.0058 | 0.0420 |
| CGA - CA+CGA           | 0.5490 | 1.0000 | 0.0197 | 0.9854 | 0.9894 | 0.8315 | 0.9996 |
| CGA - CA+Arc           | 0.9991 | 0.3584 | 1.0000 | 0.0261 | 0.0153 | 0.0102 | 0.0650 |
| CGA - CGA+Arc          | 0.8344 | 0.9992 | 0.9881 | 0.0205 | 0.0744 | 0.0180 | 0.0042 |
| CGA - CA+CGA+Arc       | 0.9998 | 0.0522 | 0.9113 | 0.0047 | 0.0383 | 0.0058 | 0.0336 |
| Arc - CA+CGA           | 1.0000 | 0.6430 | 0.0437 | 0.0841 | 0.0921 | 0.1189 | 0.1217 |
| Arc - CA+Arc           | 0.9297 | 0.9992 | 1.0000 | 0.8151 | 1.0000 | 1.0000 | 1.0000 |
| Arc - CGA+Arc          | 1.0000 | 0.9634 | 0.9113 | 0.7527 | 0.9956 | 0.9997 | 0.9627 |
| Arc - CA+CGA+Arc       | 0.8878 | 0.7162 | 0.7280 | 0.3429 | 0.9999 | 1.0000 | 1.0000 |
| CA+CGA - CA+Arc        | 0.8878 | 0.2996 | 0.0336 | 0.0036 | 0.0921 | 0.1923 | 0.1800 |
| CA+CGA - CGA+Arc       | 0.9998 | 0.9971 | 0.0029 | 0.0028 | 0.3459 | 0.2979 | 0.0135 |
| CA+CGA - CA+CGA+Arc    | 0.8344 | 0.0409 | 0.0013 | 0.0006 | 0.2049 | 0.1189 | 0.0992 |
| CA+Arc - CGA-Arc       | 0.9912 | 0.7162 | 0.9485 | 1.0000 | 0.9956 | 1.0000 | 0.9032 |
| CA+Arc - CA+CGA-Arc    | 1.0000 | 0.9634 | 0.7994 | 0.9938 | 0.9999 | 1.0000 | 1.0000 |
| CGA+Arc - CA+CGA+Arc   | 0.9798 | 0.1644 | 1.0000 | 0.9978 | 1.0000 | 0.9997 | 0.9798 |

**Table S8.** Statistical analysis of cell numbers of CA, CGA, Arc treatments, alone and in combination, in MCF-12F cells. Shown are p-values from post-hoc Tukey HSD test following a One-way ANOVA. Differences between treatment groups were considered statistically significant with  $p \leq 0.05$ .

| Treatment Comparison   | Day 1  | Day 2  | Day 3  | Day 4  | Day 5  | Day 6  | Day 7  |
|------------------------|--------|--------|--------|--------|--------|--------|--------|
| Untreated - DMSO       | 0.9996 | 0.0160 | 0.9976 | 0.5127 | 0.6098 | 0.2571 | 0.0429 |
| Untreated - CA         | 0.9996 | 0.0186 | 0.9983 | 0.9994 | 0.9968 | 0.9995 | 1.0000 |
| Untreated - CGA        | 0.9910 | 0.2457 | 1.0000 | 0.6318 | 0.8343 | 0.5256 | 0.1610 |
| Untreated - Arc        | 0.9652 | 0.0004 | 0.0005 | 0.0000 | 0.0000 | 0.0000 | 0.0000 |
| Untreated - CA+CGA     | 0.9962 | 0.0335 | 0.9231 | 0.8688 | 0.9852 | 0.9468 | 0.3880 |
| Untreated - CA+Arc     | 1.0000 | 0.0000 | 0.0002 | 0.0000 | 0.0000 | 0.0000 | 0.0000 |
| Untreated - CGA+Arc    | 1.0000 | 0.0000 | 0.0001 | 0.0000 | 0.0000 | 0.0000 | 0.0000 |
| Untreated - CA+CGA+Arc | 0.3757 | 0.0000 | 0.0000 | 0.0000 | 0.0000 | 0.0000 | 0.0000 |
| DMSO - CA              | 0.9652 | 1.0000 | 1.0000 | 0.2230 | 0.2226 | 0.0958 | 0.0429 |
| DMSO - CGA             | 0.8672 | 0.8621 | 0.9822 | 1.0000 | 0.0570 | 0.9998 | 0.9980 |
| DMSO - Arc             | 0.7597 | 0.7143 | 0.0023 | 0.0000 | 0.0000 | 0.0000 | 0.0000 |
| DMSO - CA+CGA          | 1.0000 | 1.0000 | 0.9996 | 0.9990 | 0.9852 | 0.0286 | 0.9259 |
| DMSO - CA+Arc          | 1.0000 | 0.0102 | 0.0008 | 0.0000 | 0.0000 | 0.0000 | 0.0000 |
| DMSO - CGA+Arc         | 0.9996 | 0.0011 | 0.0004 | 0.0000 | 0.0000 | 0.0000 | 0.0000 |
| DMSO - CA+CGA+Arc      | 0.6970 | 0.0138 | 0.0002 | 0.0000 | 0.0000 | 0.0000 | 0.0000 |
| CA - CGA               | 1.0000 | 0.8911 | 0.9856 | 0.3033 | 0.9968 | 0.2384 | 0.1610 |
| CA - Arc               | 0.9996 | 0.6719 | 0.0021 | 0.0000 | 0.0000 | 0.0000 | 0.0000 |
| CA - CA+CGA            | 0.9089 | 1.0000 | 0.9994 | 0.5422 | 0.7291 | 0.9992 | 0.3880 |
| CA - CA+Arc            | 0.9962 | 0.0088 | 0.0008 | 0.0000 | 0.0000 | 0.0000 | 0.0000 |
| CA - CA+CGA            | 0.9996 | 0.0009 | 0.0004 | 0.0000 | 0.0000 | 0.0000 | 0.0000 |
| CA - CA+CGA+Arc        | 0.1581 | 0.0119 | 0.0001 | 0.0000 | 0.0000 | 0.0000 | 0.0000 |
| CGA - Arc              | 1.0000 | 0.0897 | 0.0003 | 0.0000 | 0.0000 | 0.0000 | 0.0000 |
| CGA - CA+CGA           | 0.7597 | 0.9685 | 0.8184 | 0.9999 | 0.3044 | 0.0801 | 0.9996 |
| CGA - CA+Arc           | 0.9652 | 0.0005 | 0.0001 | 0.0000 | 0.0000 | 0.0000 | 0.0000 |
| CGA - CGA+Arc          | 0.9910 | 0.0001 | 0.0001 | 0.0000 | 0.0000 | 0.0000 | 0.0000 |
| CGA - CA+CGA+Arc       | 0.0868 | 0.0007 | 0.0000 | 0.0000 | 0.0000 | 0.0000 | 0.0000 |
| Arc - CA+CGA           | 0.6311 | 0.4978 | 0.0073 | 0.0000 | 0.0000 | 0.0000 | 0.0000 |
| Arc - CA+Arc           | 0.9089 | 0.2751 | 0.9998 | 0.9222 | 0.9999 | 0.9948 | 0.9259 |
| Arc - CGA+Arc          | 0.9652 | 0.0387 | 0.9928 | 0.9957 | 1.0000 | 0.9948 | 0.9998 |
| Arc - CA+CGA+Arc       | 0.0569 | 0.3409 | 0.9128 | 1.0000 | 0.9143 | 0.6121 | 0.9726 |
| CA+CGA - CA+Arc        | 0.9996 | 0.0048 | 0.0026 | 0.0000 | 0.0000 | 0.0000 | 0.0000 |
| CA+CGA - CGA+Arc       | 0.9962 | 0.0005 | 0.0012 | 0.0000 | 0.0000 | 0.0000 | 0.0000 |
| CA+CGA - CA+CGA+Arc    | 0.8170 | 0.0065 | 0.0005 | 0.0000 | 0.0000 | 0.0000 | 0.0000 |
| CA+Arc - CGA-Arc       | 1.0000 | 0.9685 | 1.0000 | 0.9998 | 1.0000 | 1.0000 | 0.9961 |
| CA+Arc - CA+CGA-Arc    | 0.4983 | 1.0000 | 0.9944 | 0.9363 | 0.9927 | 0.9664 | 1.0000 |
| CGA+Arc - CA+CGA+Arc   | 0.3757 | 0.9374 | 0.9999 | 0.9972 | 0.9797 | 0.9664 | 0.9996 |

**A**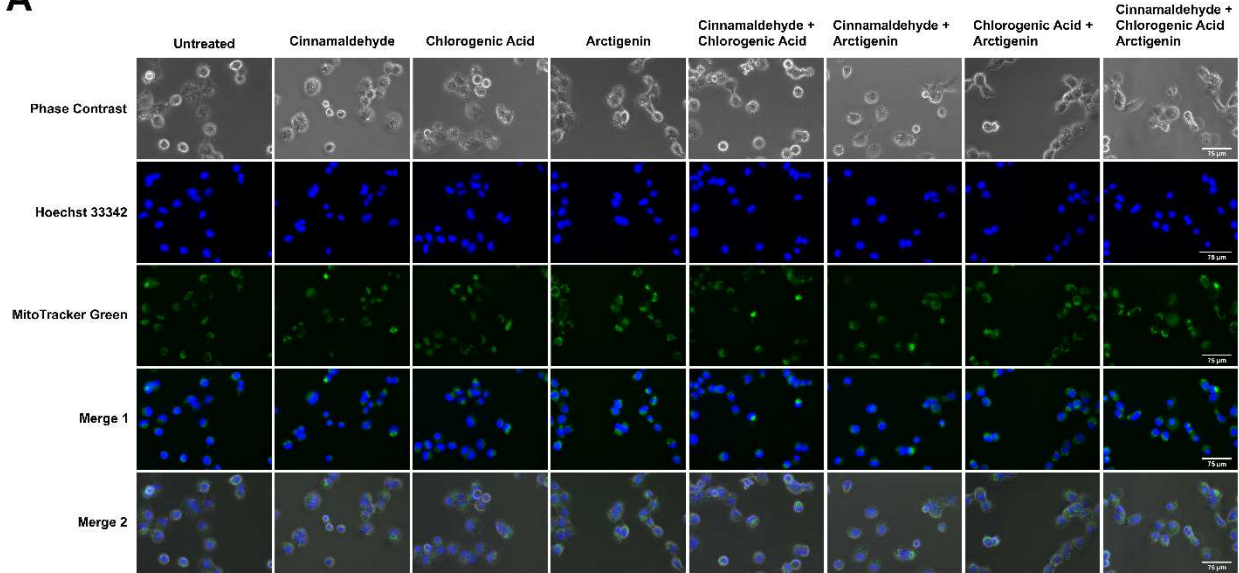**B**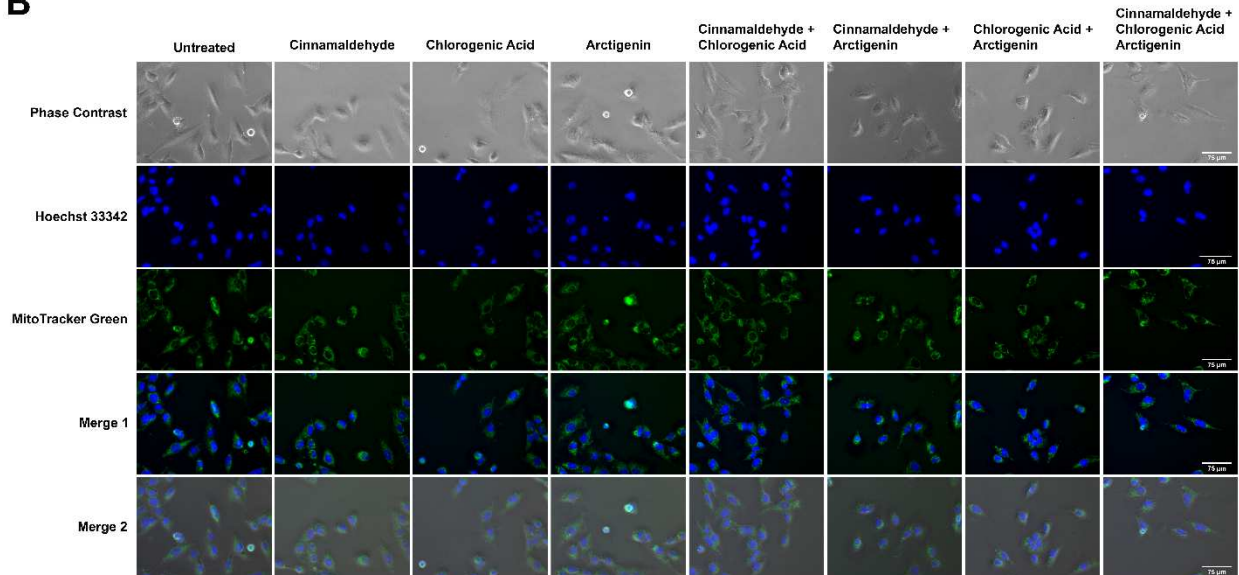

**Figure S6.** Representative fluorescence microscopy images of (A) MCF-7 and (B) MCF-10A cells treated with CA, CGA, and Arc, alone and in combination for 6 h. After 6 h treatment, cells were stained with final concentrations of 150 μM MitoTracker® Green FM and 1 μg/mL of Hoechst 33342 before visualization at 40X magnification.

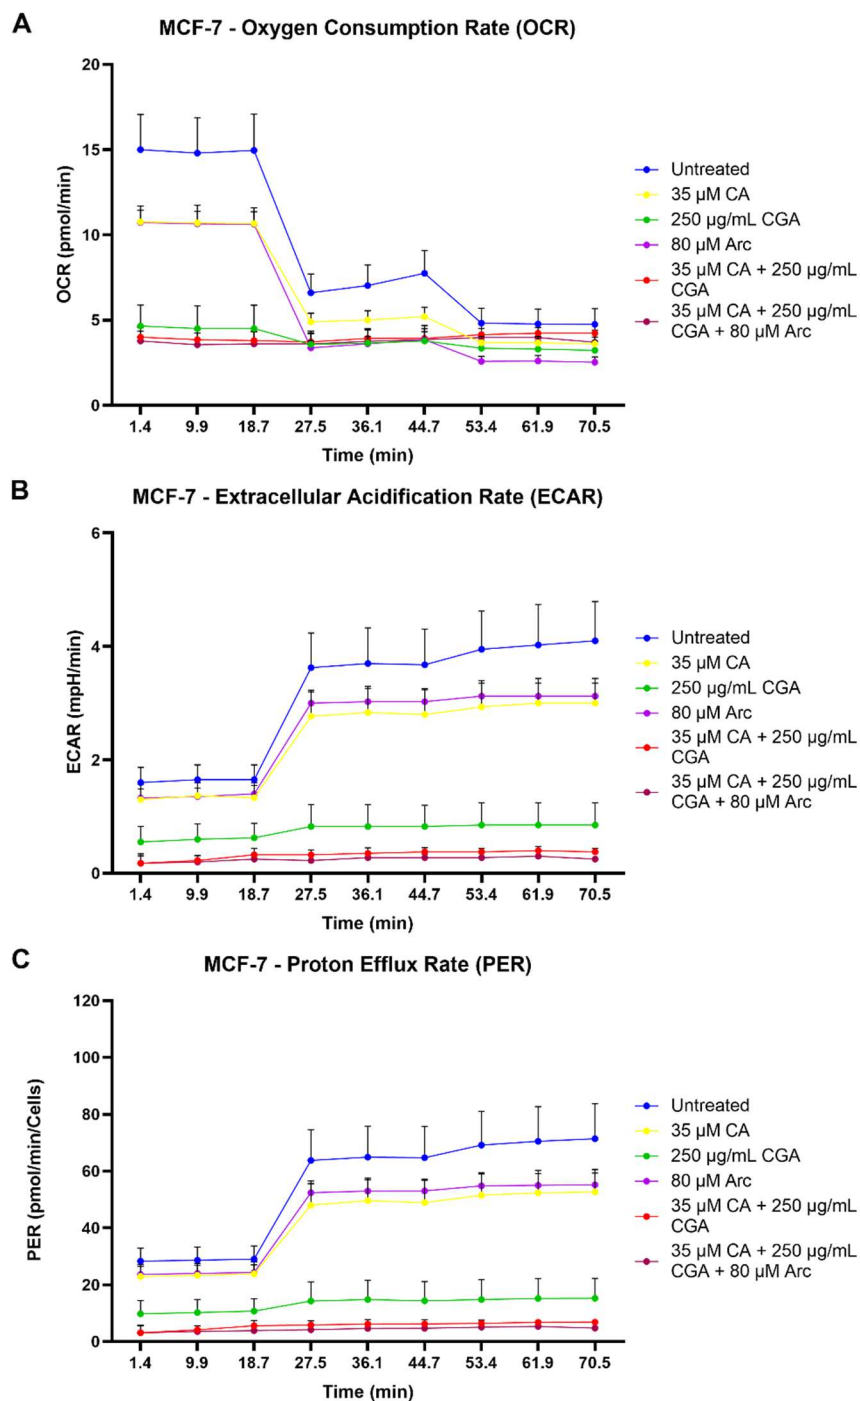

**Figure S7.** A) OCR, B) ECAR, and C) PER rates at baseline, after oligomycin injection, and after rotenone + antimycin A injection in MCF-7 breast cancer cells treated with 35  $\mu$ M CA, 250  $\mu$ g/mL CGA, 80  $\mu$ M Arc, for 48 h. Points in graphs represent mean of means  $\pm$  SEM from 3 biological and 4 experimental replicates ( $n=4$ ) of A) OCR (pmol/min), B) ECAR (mpH/min), and C) PER (pmol/min/cells) values in MCF-7 cells of each treatment group. Oligomycin injection occurred at 18.7 min and rotenone A + antimycin A injection at 44.7 min.
